# Supplementary material
Source: PubMed Central journal article supplement (PMC5821064)
Supplement: NIHMS838150-supplement-9.pdf [file NIHMS838150-supplement-9.pdf]

# Supplemental Table 1

| Drugs                     | Dose (mg)                                    | Size  | Charge  | Stability   |
|---------------------------|----------------------------------------------|-------|---------|-------------|
| <b>Celecoxib liposome</b> |                                              |       |         |             |
|                           | 2.0                                          | 68.4  | 0.83    | 10-12 weeks |
|                           | 3.0                                          |       | Crashed |             |
|                           | 4.0                                          |       | Crashed |             |
| <b>Plumbagin liposome</b> |                                              |       |         |             |
|                           | 0.2                                          | 66.32 | 0.87    | 10-12 weeks |
|                           | 0.4                                          | 64.83 | 1.32    | 10-12 weeks |
|                           | 0.8                                          | 69.76 | 0.66    | 10-12 weeks |
| <b>CelePlum-777</b>       |                                              |       |         |             |
|                           | <b>20:1</b> (Celecoxib 2.0 + Plumbagin 0.1)* | 69.43 | 1.04    | 6-8 weeks   |
|                           | <b>10:1</b> (Celecoxib 2.0 + Plumbagin 0.2)* | 64.83 | 0.98    | 6-8 weeks   |
|                           | <b>5:1</b> (Celecoxib 2.0 + Plumbagin 0.4)   | 66.14 | 0.82    | Not tested  |
|                           | <b>2.5:1</b> (Celecoxib 2.0 + Plumbagin 0.8) | 63.32 | 1.49    | 4 days      |
