# Supplementary material
Source: PubMed Central journal article supplement (PMC5821064)
Supplement: NIHMS838150-supplement-10.pdf [file NIHMS838150-supplement-10.pdf]

# Supplemental Table 2

## System toxicity - Serum analysis

| Serum parameters              | Empty liposome | Celecoxib liposome (15 mg/kg) | Plumbagin liposome (1.5 mg/kg) | CelePlum-777 (Celecoxib-15 mg/kg) + Plumbagin 1.5 mg/kg |                 |
|-------------------------------|----------------|-------------------------------|--------------------------------|---------------------------------------------------------|-----------------|
| SGOT(AST)<br>(110 - 247 u/L)  | 164 ± 7.5      | 169 ± 11                      | 224 ± 12                       | 137 ± 9                                                 | Liver function  |
| SGPT(ALT)<br>(33.4 - 132 u/L) | 110 ± 13       | 91 ± 4.7                      | 103 ± 20                       | 103 ± 7                                                 |                 |
| ALKP<br>(62.0 - 209 u/L)      | 123 ± 19       | 106 ± 15                      | 94 ± 29                        | 127 ± 18                                                |                 |
| GLB<br>(2.5 - 4.6 mg/dL)      | 5.2 ± 0.1      | 5.1 ± 0.1                     | 4.8 ± 0.0                      | 4.9 ± 0.2                                               |                 |
| TPR<br>(3.6 - 6.6 g/dL)       | 6.3 ± 0.1      | 6.4 ± 0.2                     | 5.9 ± 0.2                      | 5.9 ± 0.5                                               |                 |
| TBIL<br>(0.1 - 0.9 mg/dL)     | 0.3 ± 0.1      | 0.3 ± 0.0                     | 0.3 ± 0.0                      | 0.3 ± 0.1                                               |                 |
| BUN<br>(18 - 33.7 mg/dL)      | 20 ± 1.5       | 23 ± 2                        | 21 ± 2.3                       | 24 ± 0.3                                                | Kidney function |
| CHOL<br>(36 - 96 mg/dL)       | 88 ± 13        | 114 ± 14                      | 81 ± 11                        | 102 ± 10                                                | Lipid profile   |
| TRIG<br>(55 - 144 mg/dL)      | 110 ± 17       | 134 ± 23                      | 139 ± 10                       | 64 ± 11                                                 |                 |
| GLU<br>(198 - 232 mg/dL)      | 220 ± 7.8      | 237 ± 13                      | 207 ± 8.7                      | 231 ± 10                                                | Glucose level   |
| AMY<br>(1691 - 3615 u/L)      | 2921 ± 123     | 2827 ± 48                     | 3157 ± 91                      | 2360 ± 120                                              |                 |
| CAL<br>(5.9 - 9.4 mg/dL)      | 10 ± 0.1       | 12 ± 0.2                      | 10 ± 0.5                       | 7.8 ± 2.4                                               |                 |
| PHOS<br>(6.1 - 10 mg/dL)      | 12 ± 0.7       | 9.7 ± 0.3                     | 9.5 ± 0.3                      | 8.8 ± 1.2                                               |                 |
