# Supplementary material
Source: PubMed Central journal article supplement (PMC5821064)
Supplement: NIHMS838150-supplement-11.pdf [file NIHMS838150-supplement-11.pdf]

# Supplemental Table 3

Change in Protein Levels Compared to Untreated Cells at 24 hours

| COX and cPLA2 Signaling | UACC 903 |     |        | 1205Lu |     |        |
|-------------------------|----------|-----|--------|--------|-----|--------|
|                         | CL       | PL  | CP-777 | CL     | PL  | CP-777 |
| COX I                   | ↑        | ↑   | ↓↓     | NC     | ↓   | ↓↓     |
| COX II                  | ↑↑↑      | ↑↑↑ | ↑↑↑    | ↑↑↑    | ↑↑↑ | ↑↑↑    |
| pcPLA2                  | ↑        | ↑   | NC     | ↓      | ↓   | ↓↓     |
| cPLA2                   | ↑        | ↑   | ↑      | ↓      | NC  | ↓      |
| pcPLA2/cPLA2            | NC       | NC  | ↓      | NC     | ↓   | ↓      |

  

| Akt Signaling | UACC 903 |     |        | 1205Lu |     |        |
|---------------|----------|-----|--------|--------|-----|--------|
|               | CL       | PL  | CP-777 | CL     | PL  | CP-777 |
| p21           | ↑↑       | ↑↑↑ | ↓      | ↑↑↑    | ↑↑↑ | ↓      |
| p27           | ↑↑       | ↑↑  | ↑↑     | ↑      | ↑   | ↑      |
| pAkt          | ↑        | ↑↑  | ↑↑     | ↓      | ↑↑  | NC     |
| Akt           | ↑        | ↑   | ↑      | ↓      | ↑   | ↓↓     |
| pAkt/Akt      | NC       | ↑   | ↑      | ↑↑     | ↑↑↑ | ↑↑     |

  

| Cyclin Expression  | UACC 903 |    |        | 1205Lu |    |        |
|--------------------|----------|----|--------|--------|----|--------|
|                    | CL       | PL | CP-777 | CL     | PL | CP-777 |
| cyclin A2          | ↓        | ↓  | ↓↓     | ↑      | ↑  | NC     |
| cyclin B1          | ↓↓       | ↓  | ↓↓↓    | ↓      | ↓  | ↓↓     |
| cyclin D1          | ↑↑       | ↑  | ↓↓↓    | ↑↑     | ↑  | ↓↓↓    |
| cyclin E1 (both)   | ↑↑       | ↑  | ↑↑     | ↑↑     | ↑↑ | ↑↑     |
| cyclin E1 (bottom) | ↑↑       | ↑  | NC     | ↑↑     | ↑↑ | ↑↑     |
| cyclin E2          | NC       | ↓↓ | ↓↓↓    | NC     | ↓  | NC     |
| cyclin H           | ↑        | NC | ↓↓     | ↑      | NC | ↓↓     |

  

| Stat3 Signaling | UACC 903 |     |        | 1205Lu |    |        |
|-----------------|----------|-----|--------|--------|----|--------|
|                 | CL       | PL  | CP-777 | CL     | PL | CP-777 |
| pStat3          | ↓        | ↓↓  | ↓↓↓    | NC     | ↓↓ | ↓↓↓    |
| Stat3           | ↑↑       | ↑↑  | ↑      | ↓      | ↓↓ | ↓↓↓    |
| pStat3/Stat3    | ↓↓       | ↓↓↓ | ↓↓↓    | ↑      | ↓↓ | ↓↓↓    |

↑↑↑ >500%  
 ↑↑ 200-500%  
 ↑ 120-200%  
 NC 80-120%  
 ↓ 50-80%  
 ↓↓ 20-50%  
 ↓↓↓ <20%

**CP**=Celecoxib Liposome  
**PL**=Plumbagin Liposome  
**CP-777**=CelePlum-777
