# Supplementary material
Source: PubMed Central journal article supplement (PMC5821064)

# Supplemental Figure 5

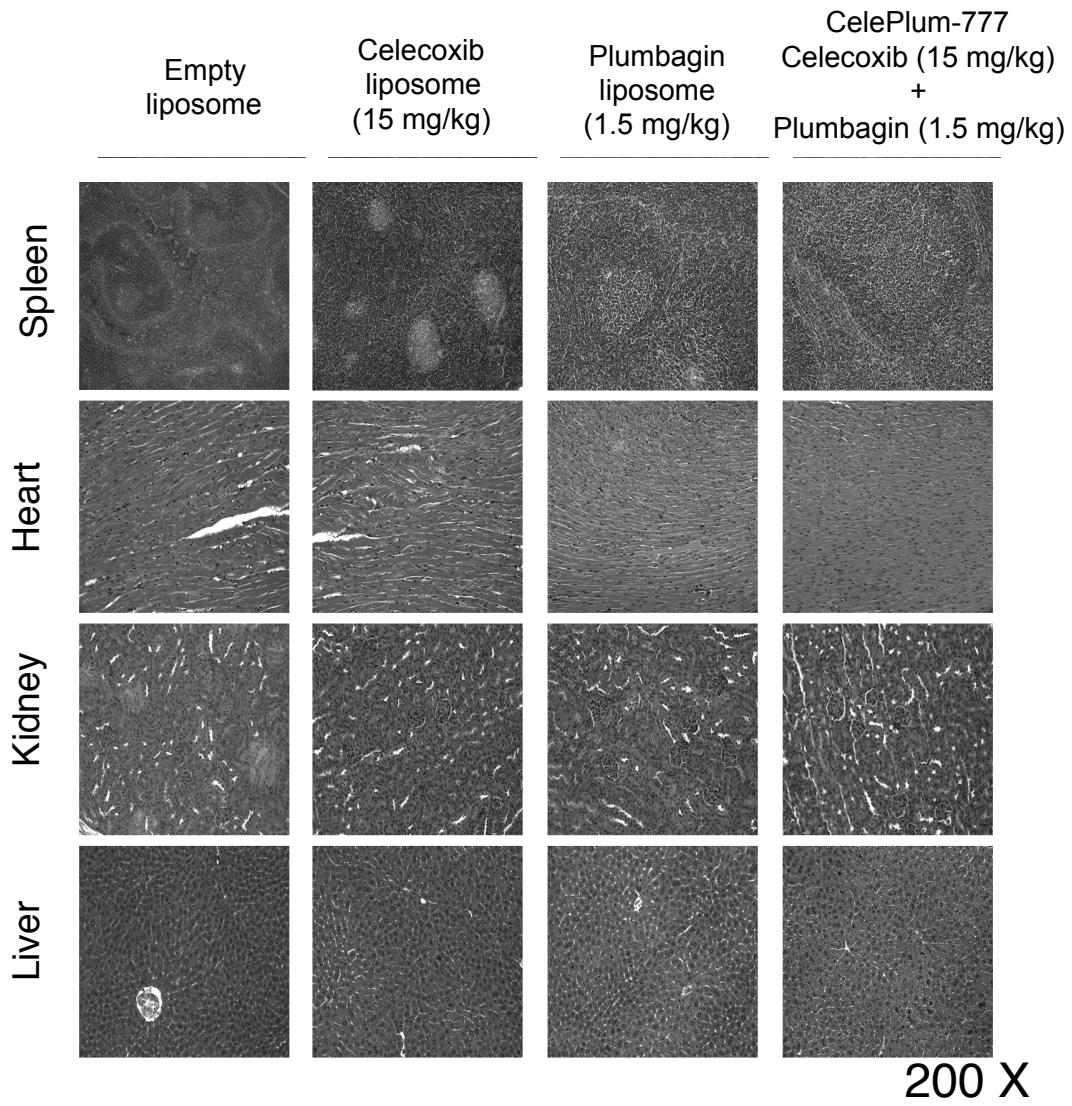

Supplement: NIHMS838150-supplement-5.pdf [file NIHMS838150-supplement-5.pdf]
